# Supplementary material for: Performance of Restricted Mean Survival Time Based Methods and Traditional Survival Methods: An Application in an Oncological Data
Source: Hindawi journal article supplement (doi:10.1155/2022/7264382), 2022-12-28

Check Proportional hazard assumption

(KM curves and  $\ln(-\ln(S(t)))$  vs  $\ln(t)$  Curves)

# Dichotomous age

### Product-Limit Survival Estimates

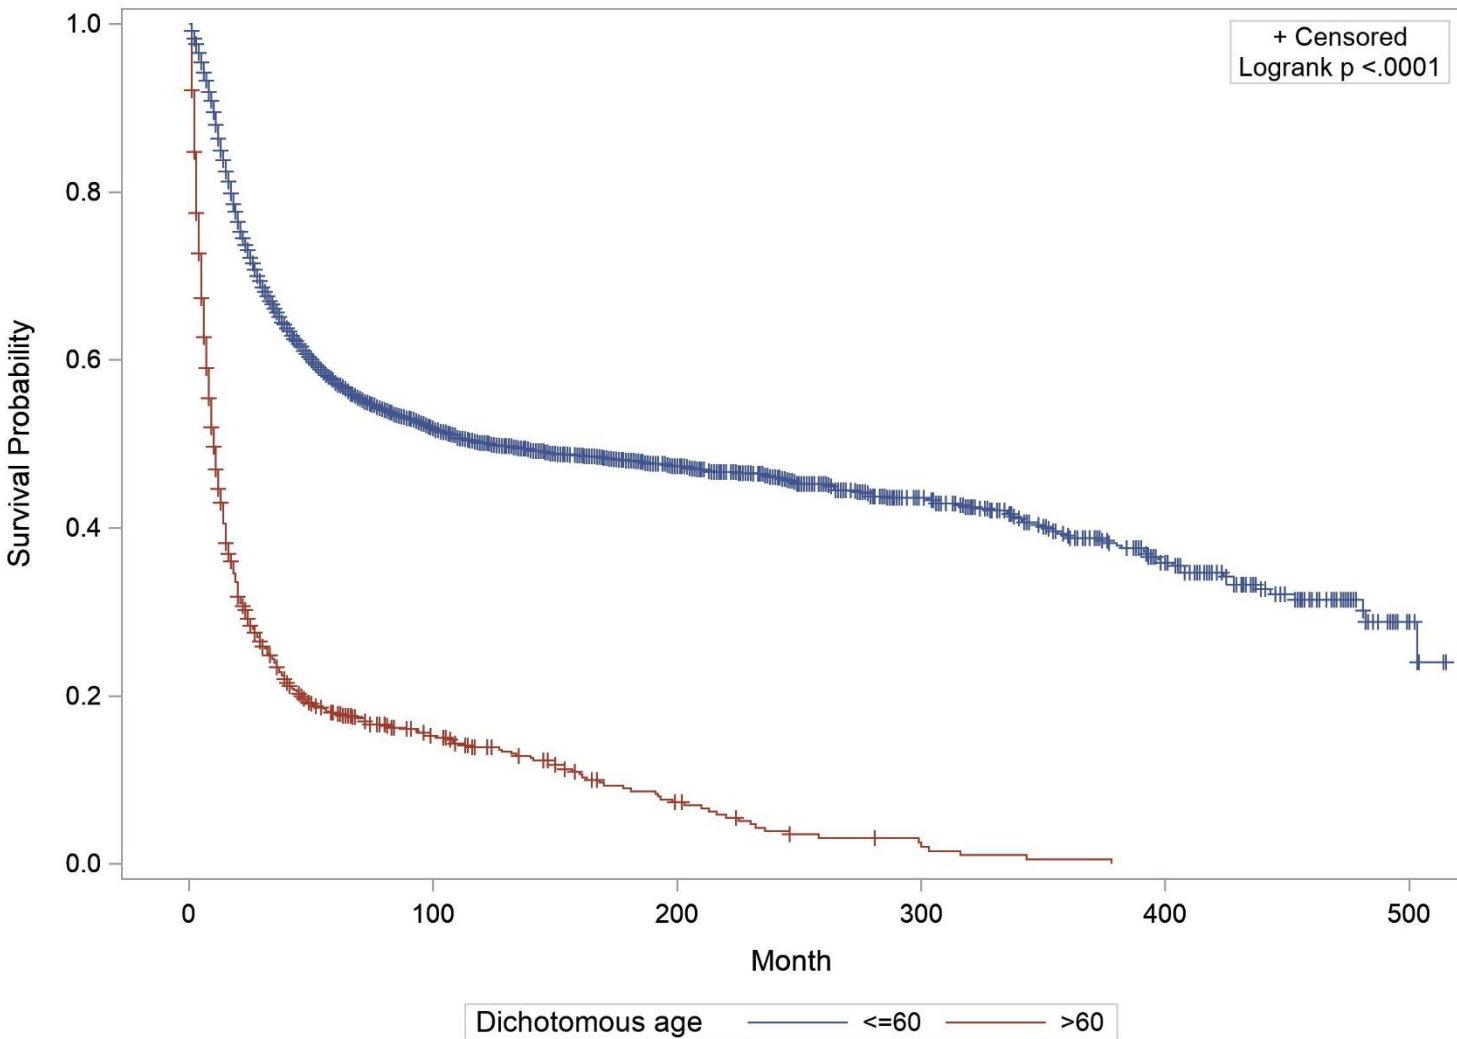

### Log of Negative Log of Estimated Survivor Functions

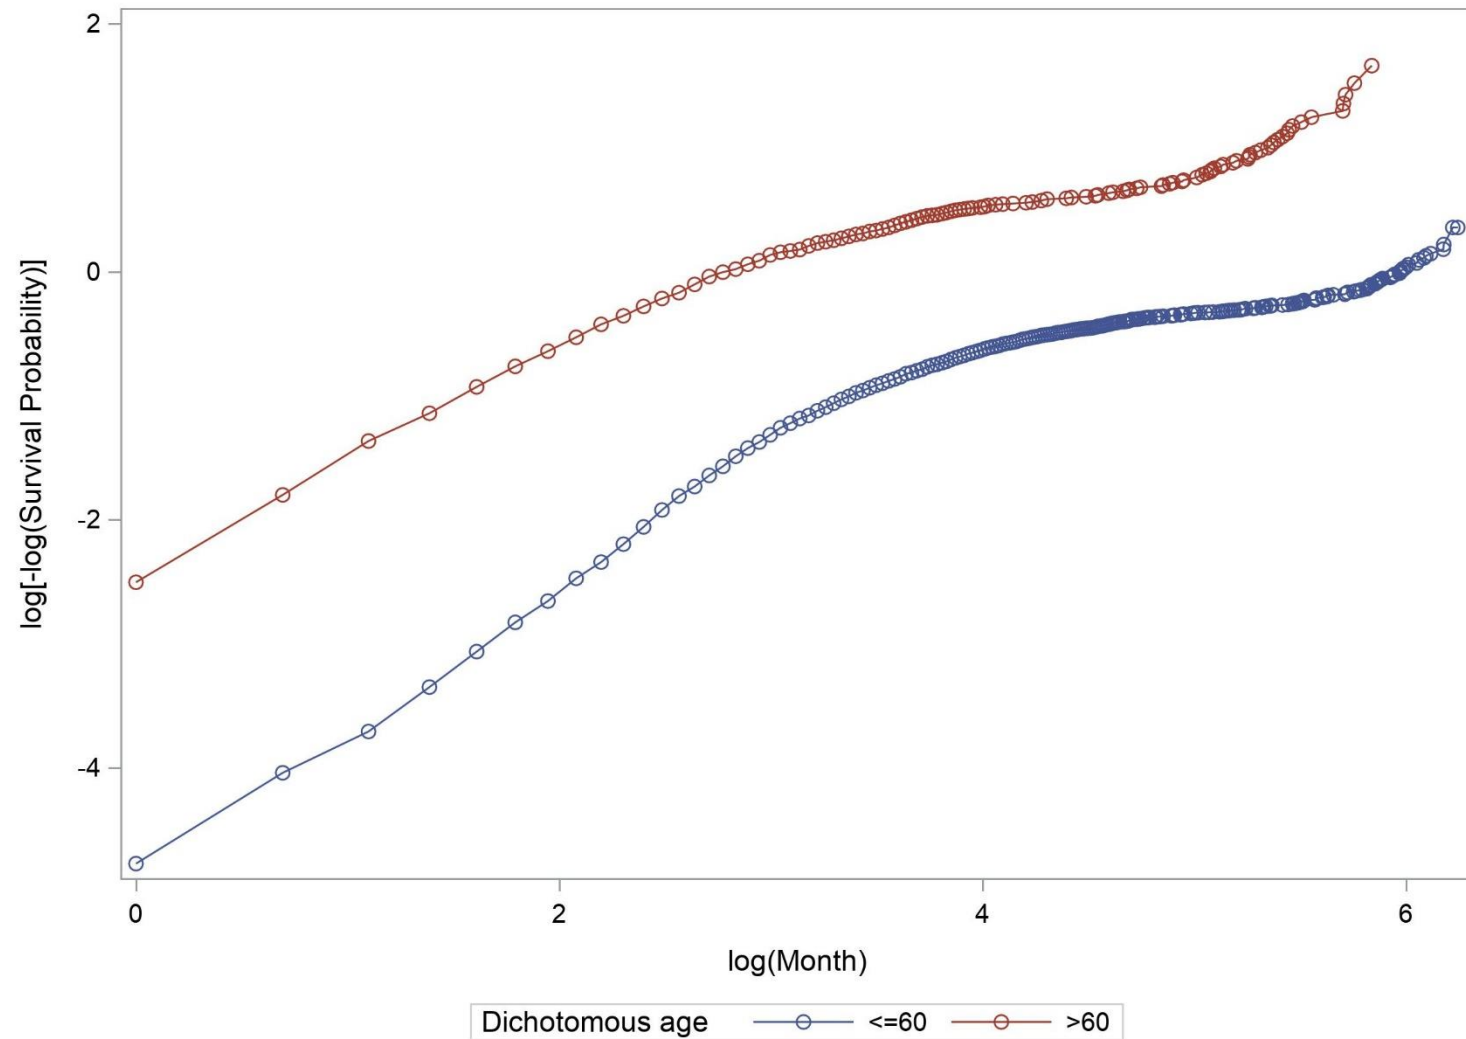

Product-Limit Survival Estimates

+ Censored  
Logrank p=0.0048

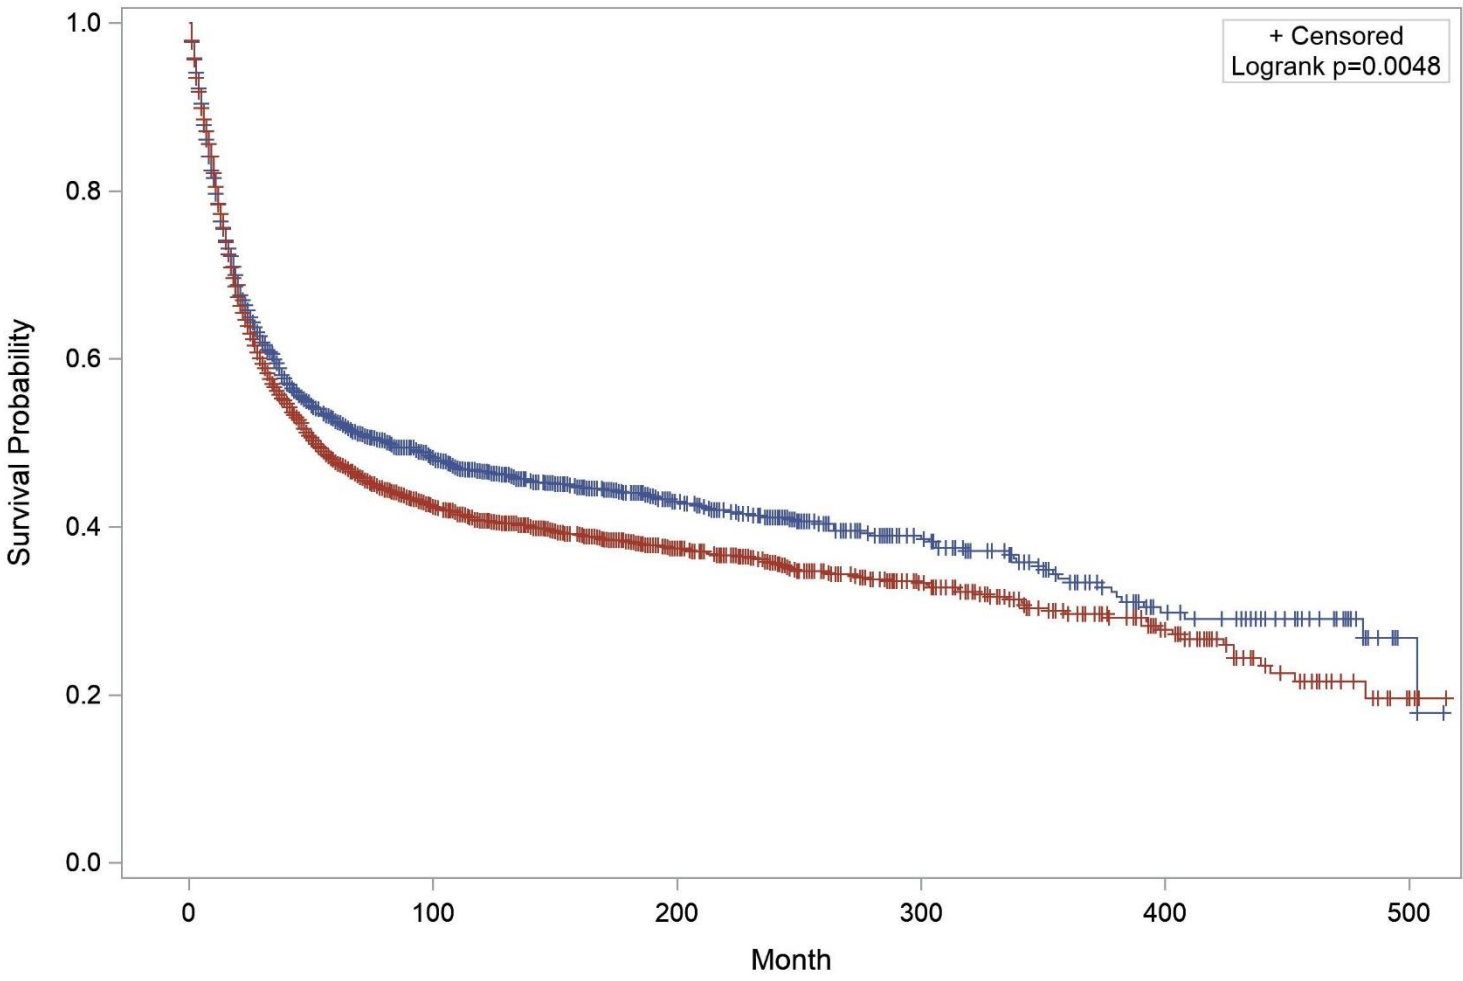

Sex — Female — Male

Log of Negative Log of Estimated Survivor Functions

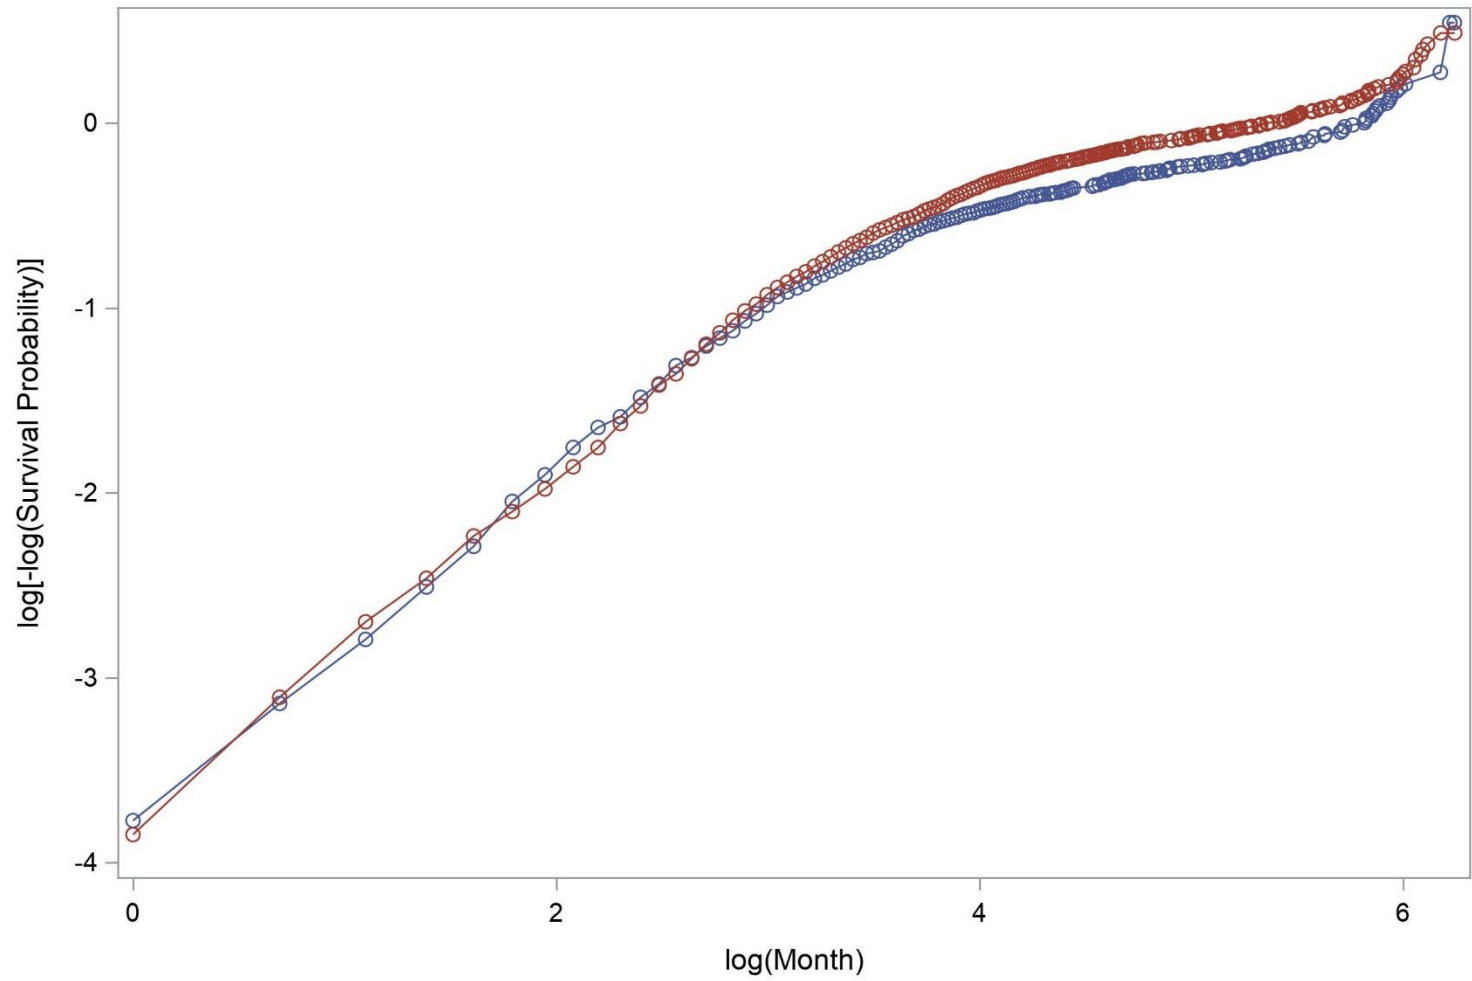

Sex — Female — Male

# Year of diagnosis

### Log of Negative Log of Estimated Survivor Functions

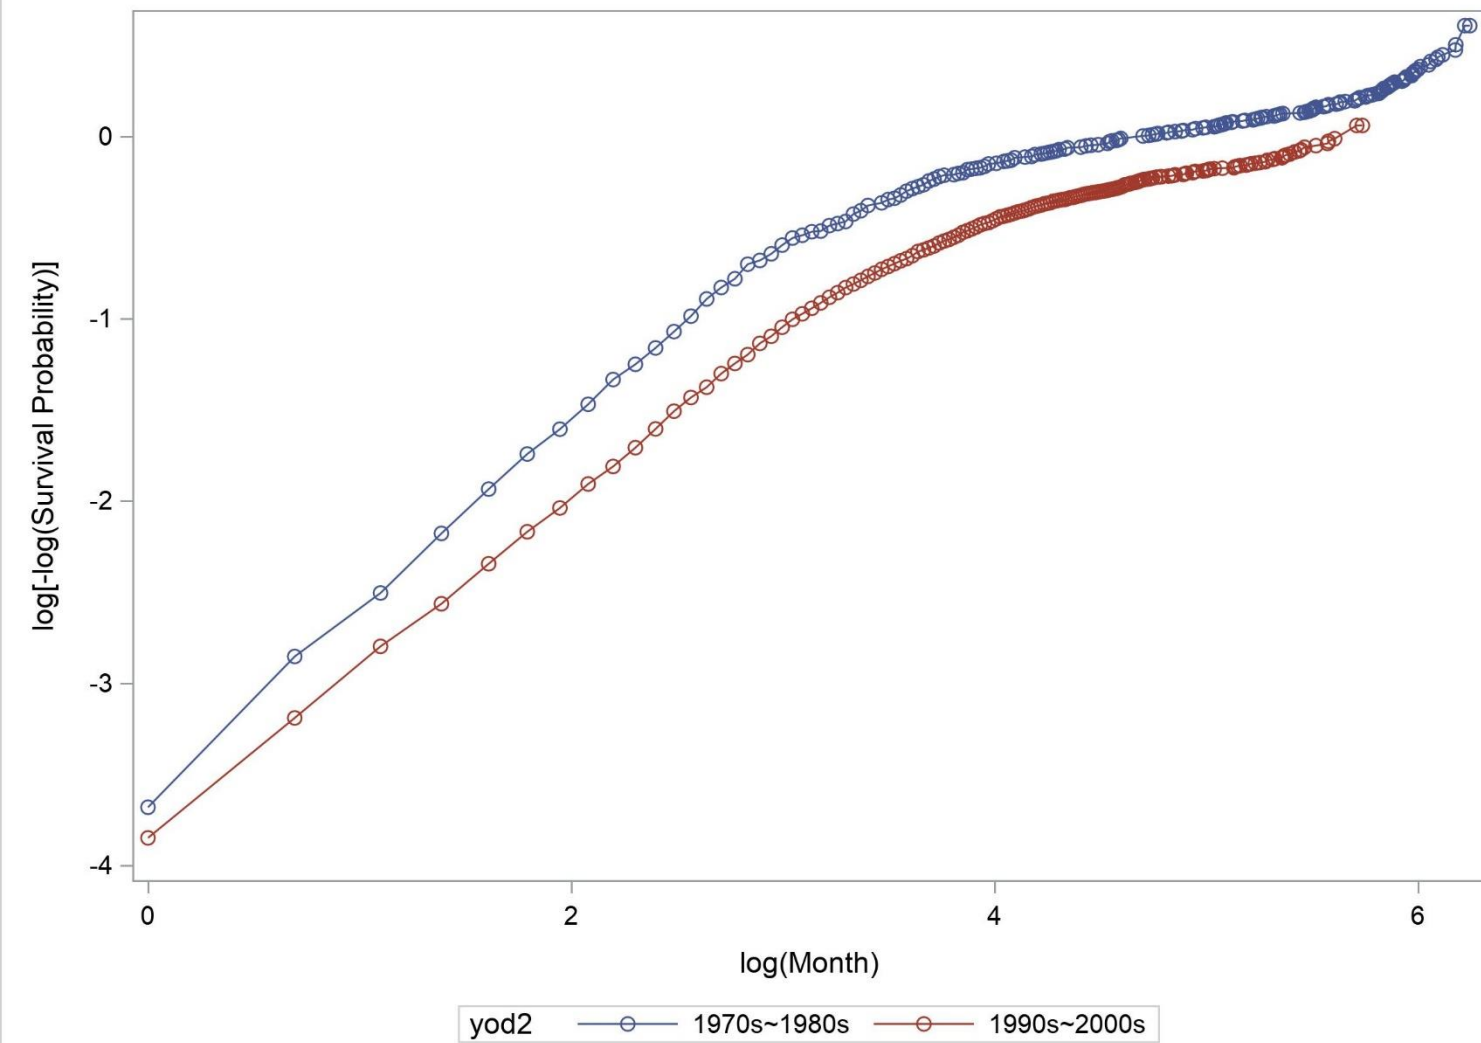

### Product-Limit Survival Estimates

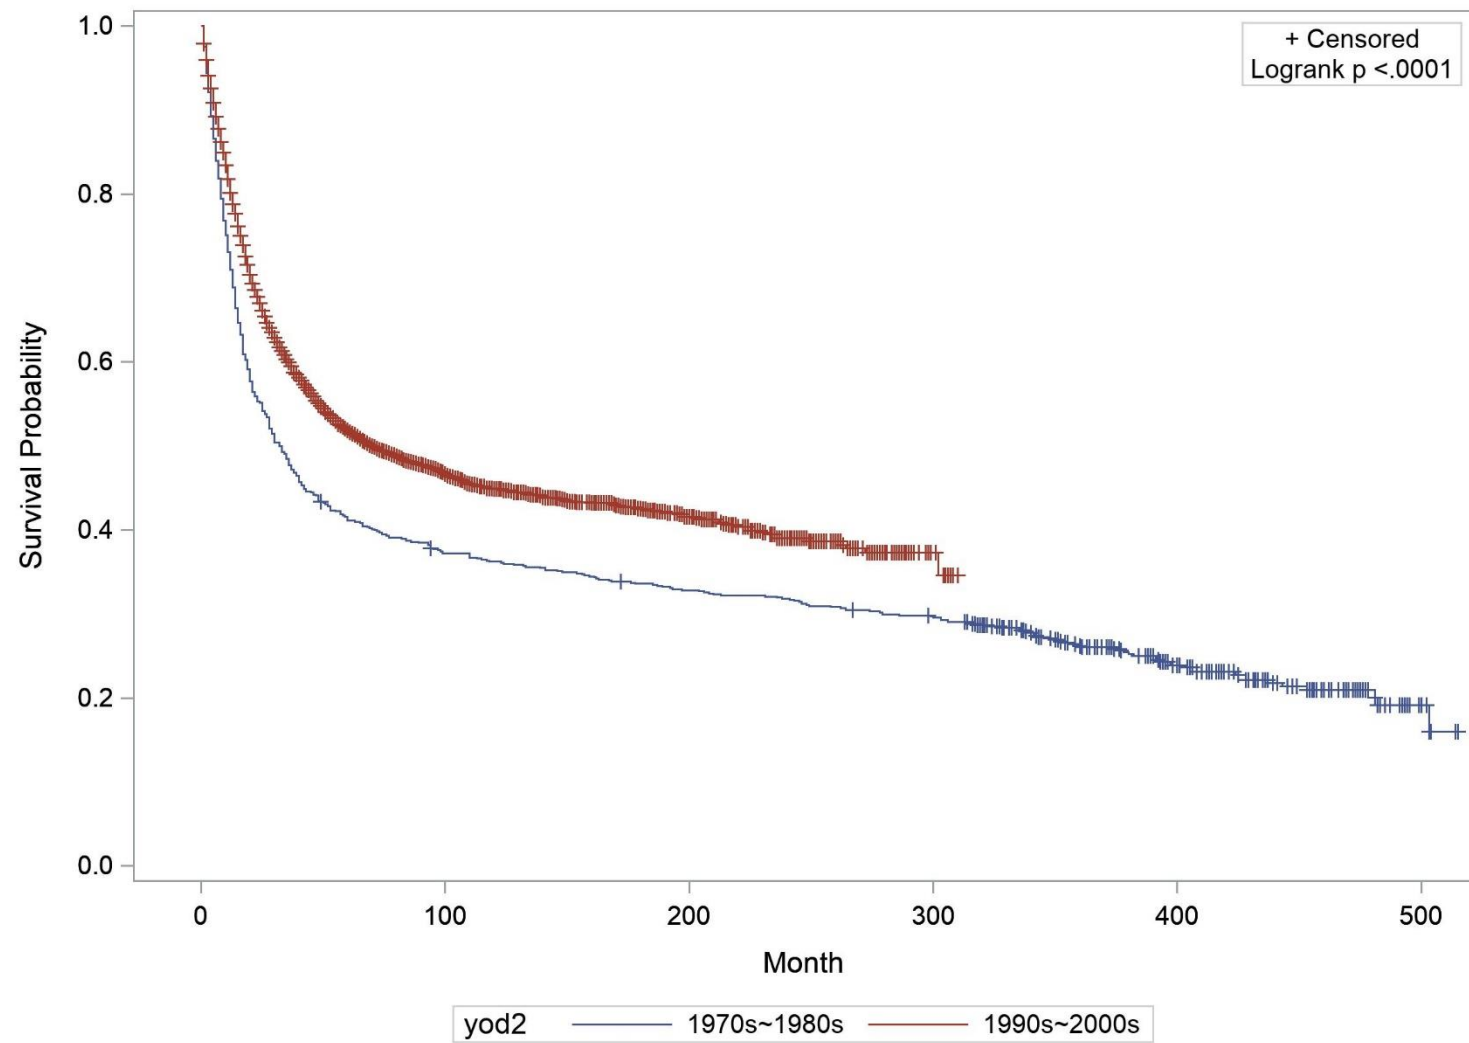

# Race

### Product-Limit Survival Estimates

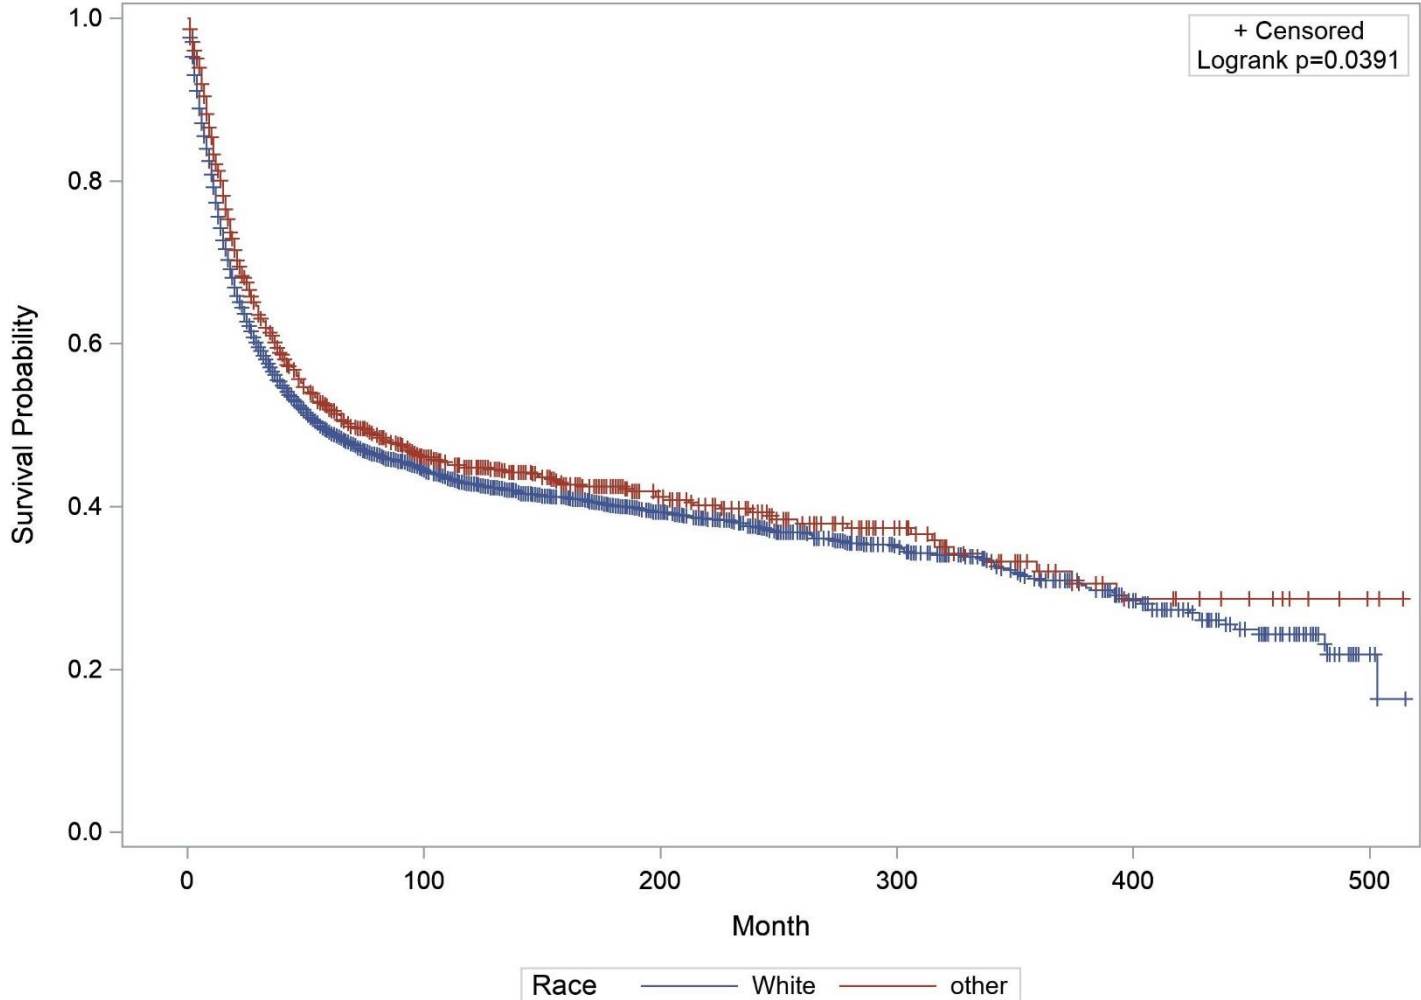

### Log of Negative Log of Estimated Survivor Functions

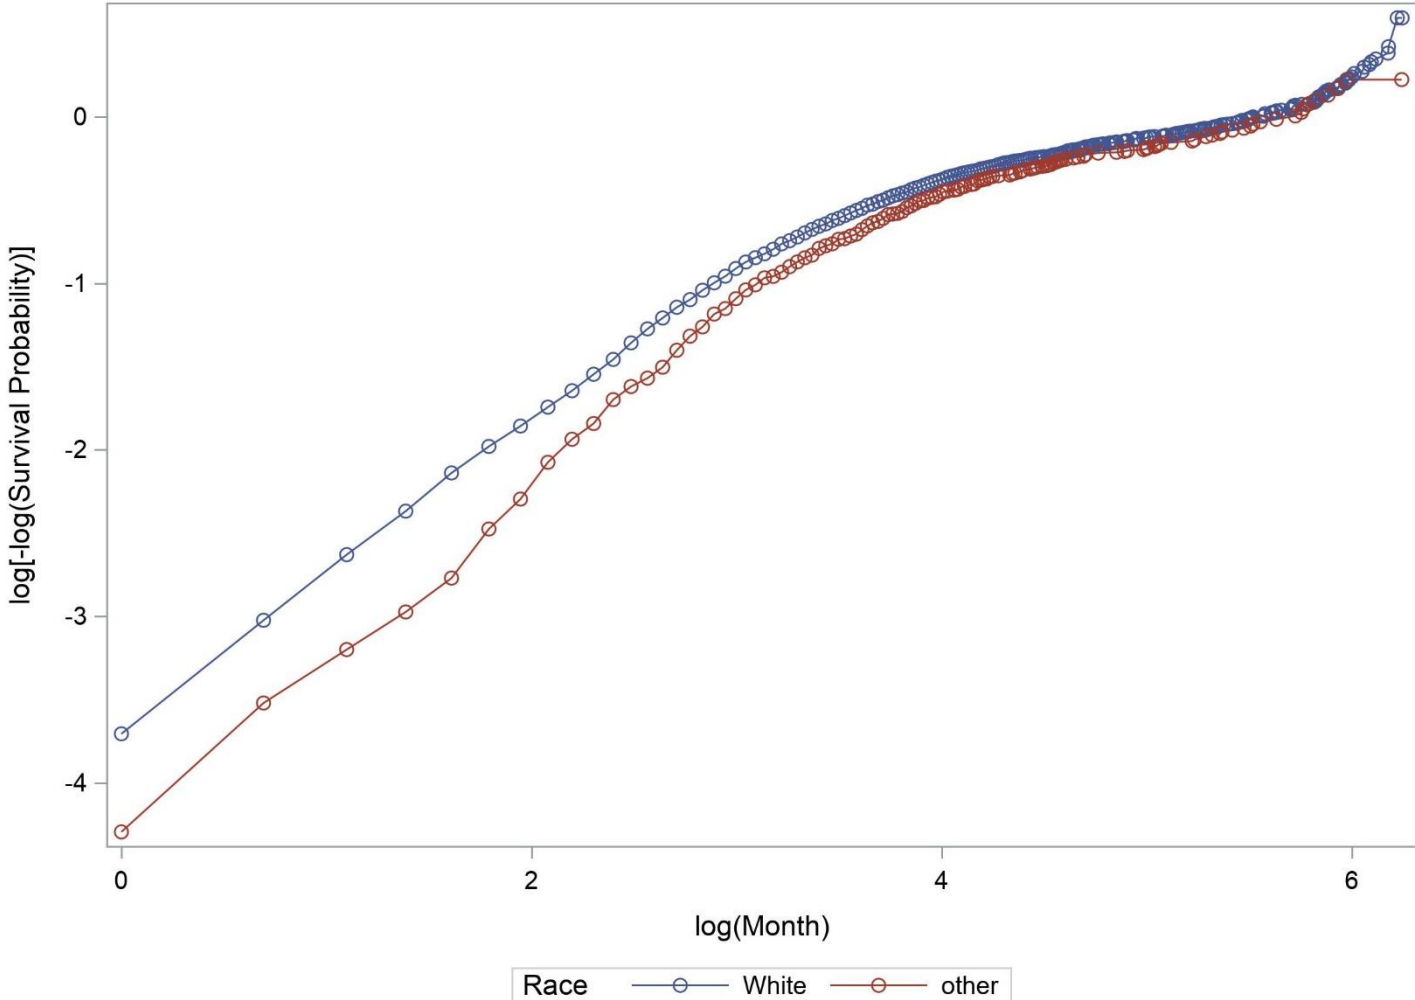

# Tumor size

### Product-Limit Survival Estimates

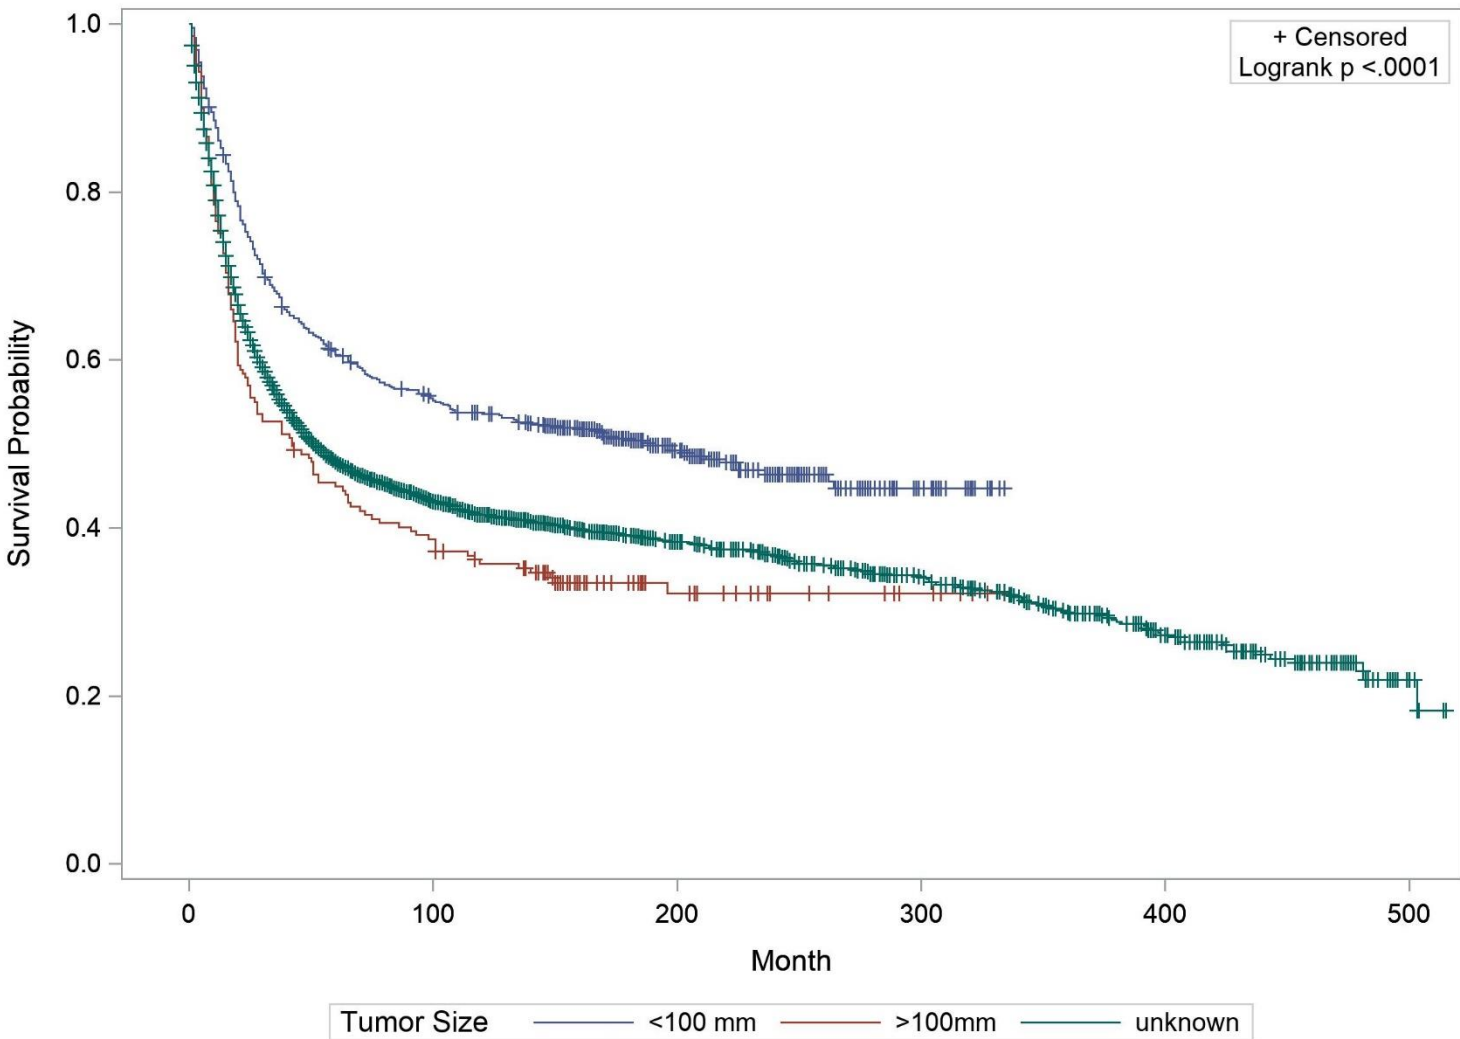

### Log of Negative Log of Estimated Survivor Functions

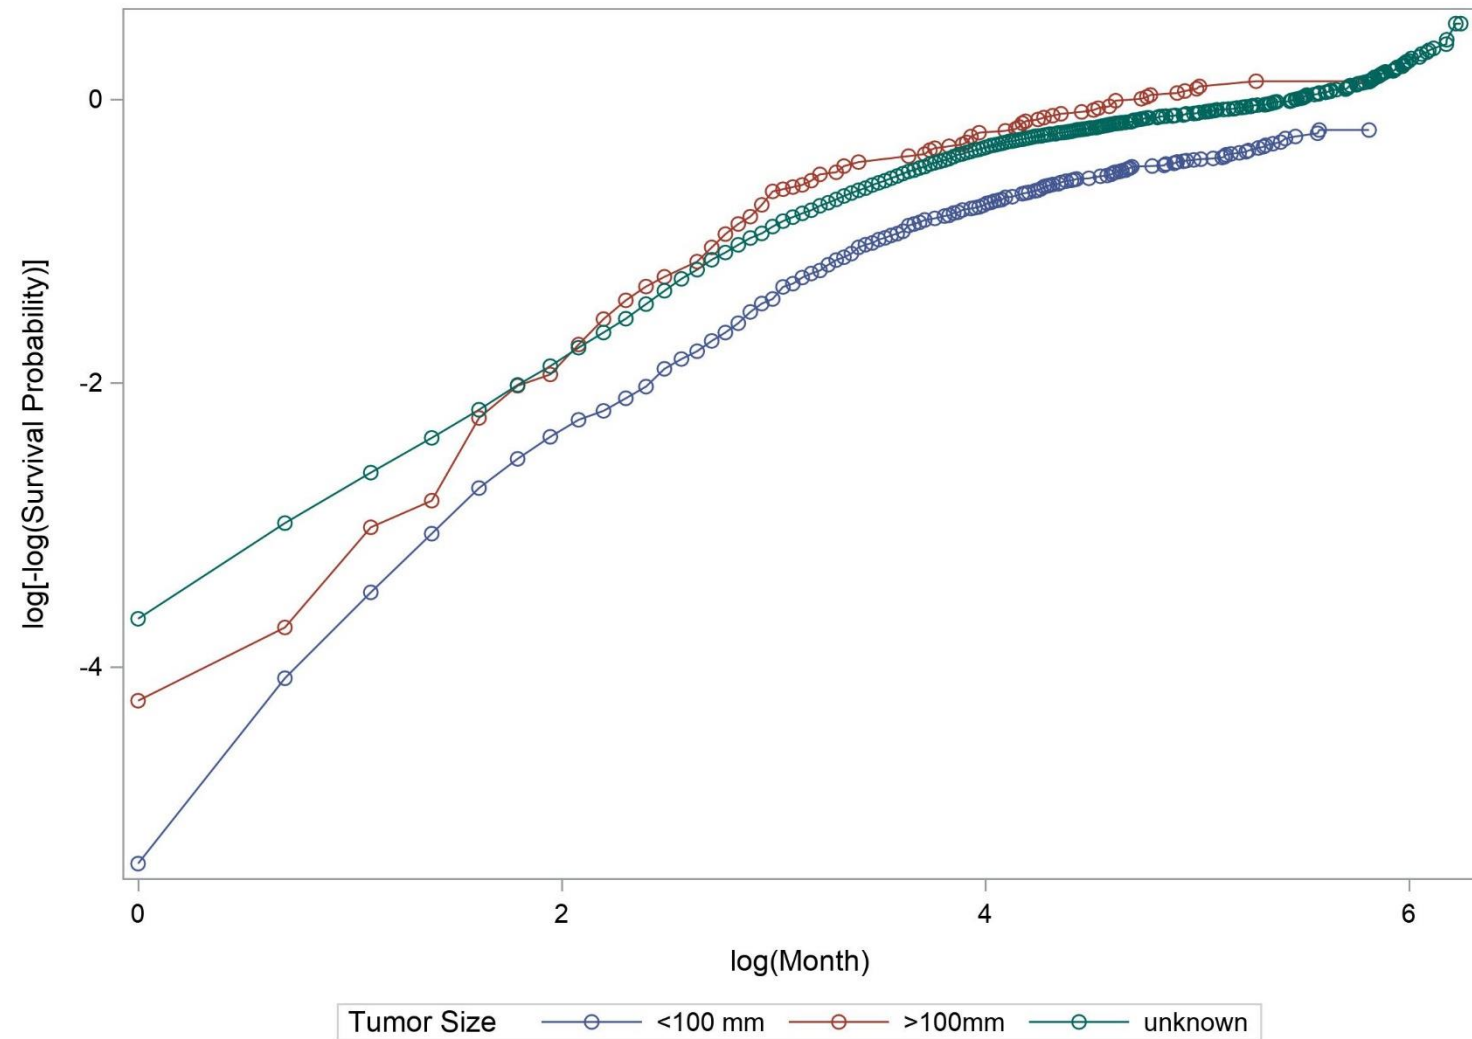

# Extend of disease

### Product-Limit Survival Estimates

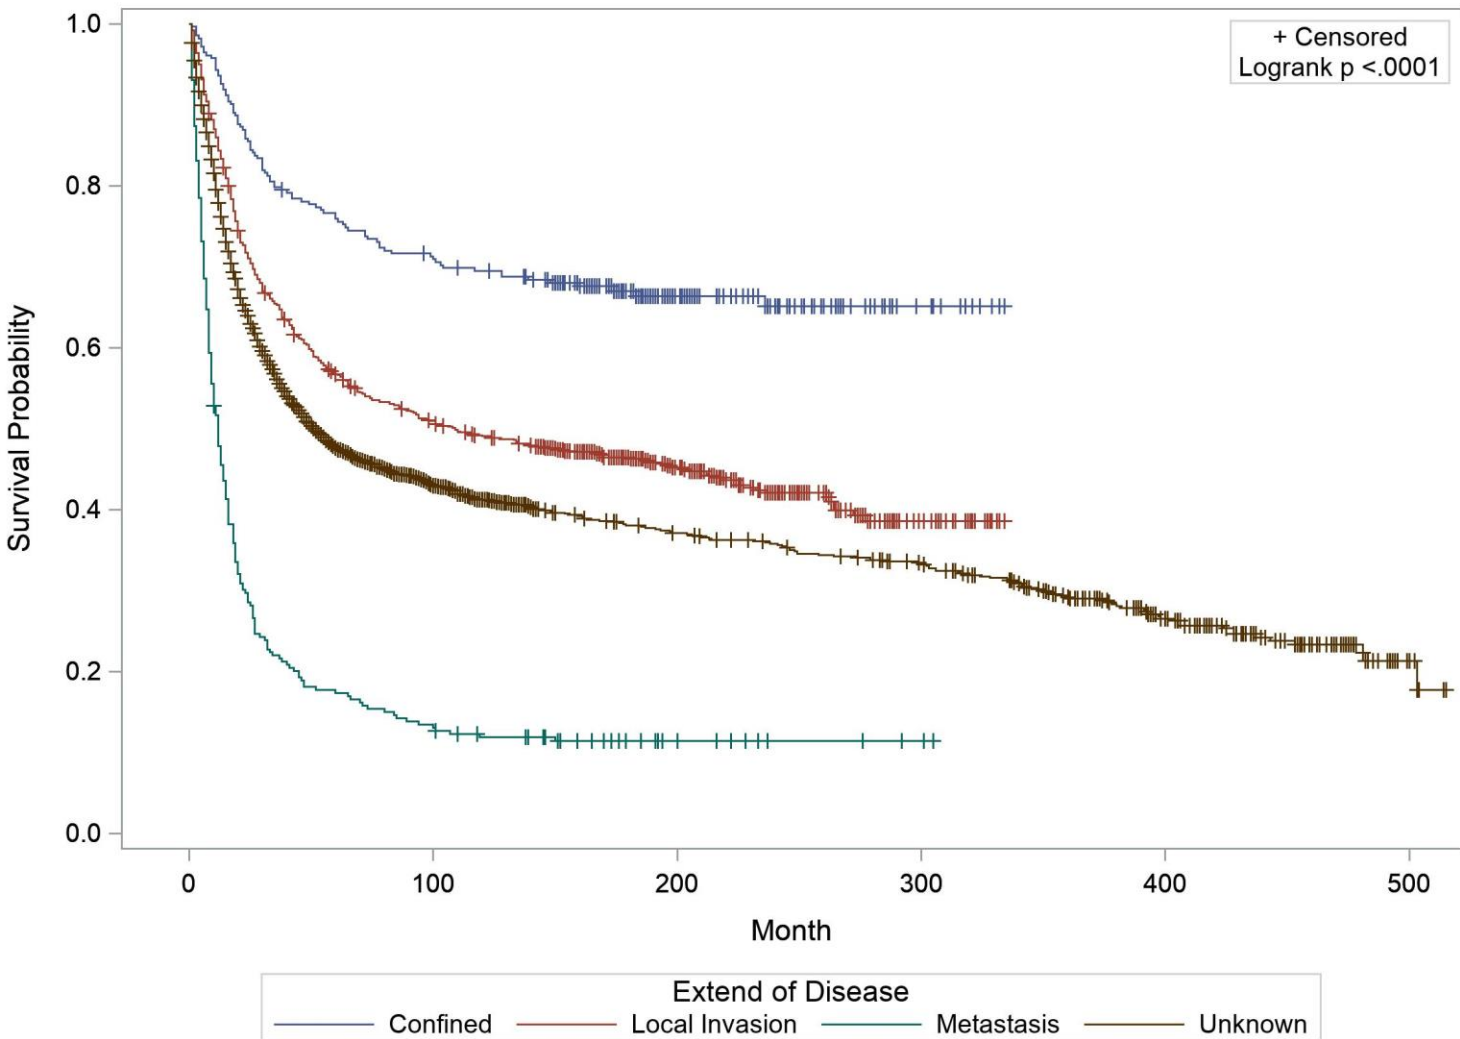

### Log of Negative Log of Estimated Survivor Functions

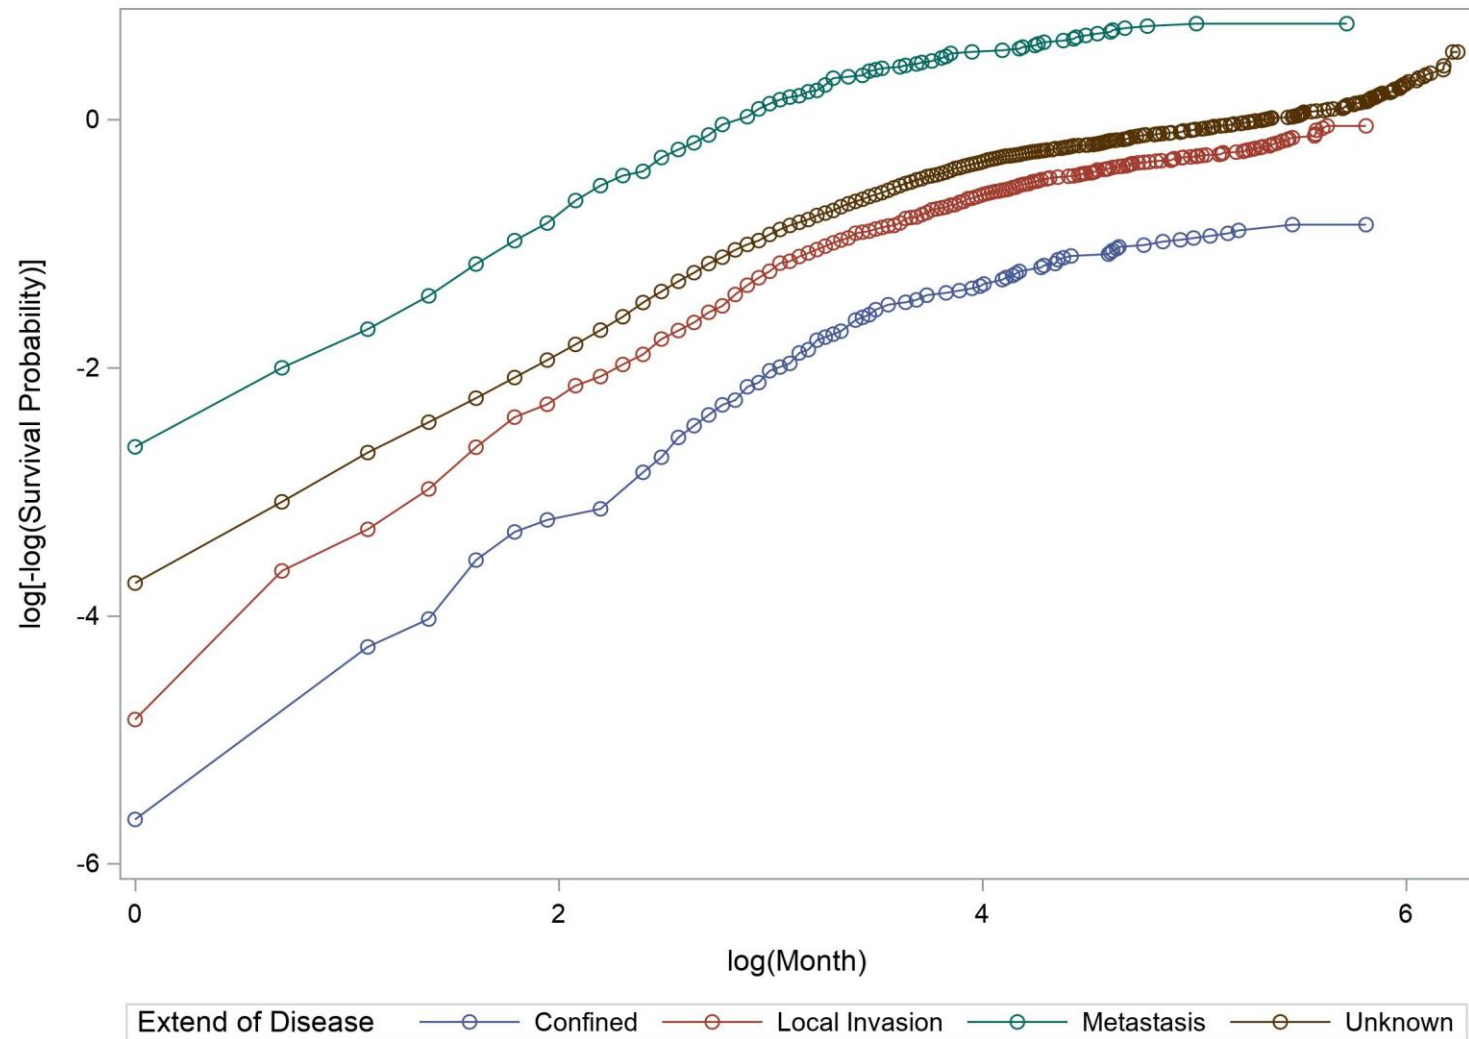

# AJCC stage

### Product-Limit Survival Estimates

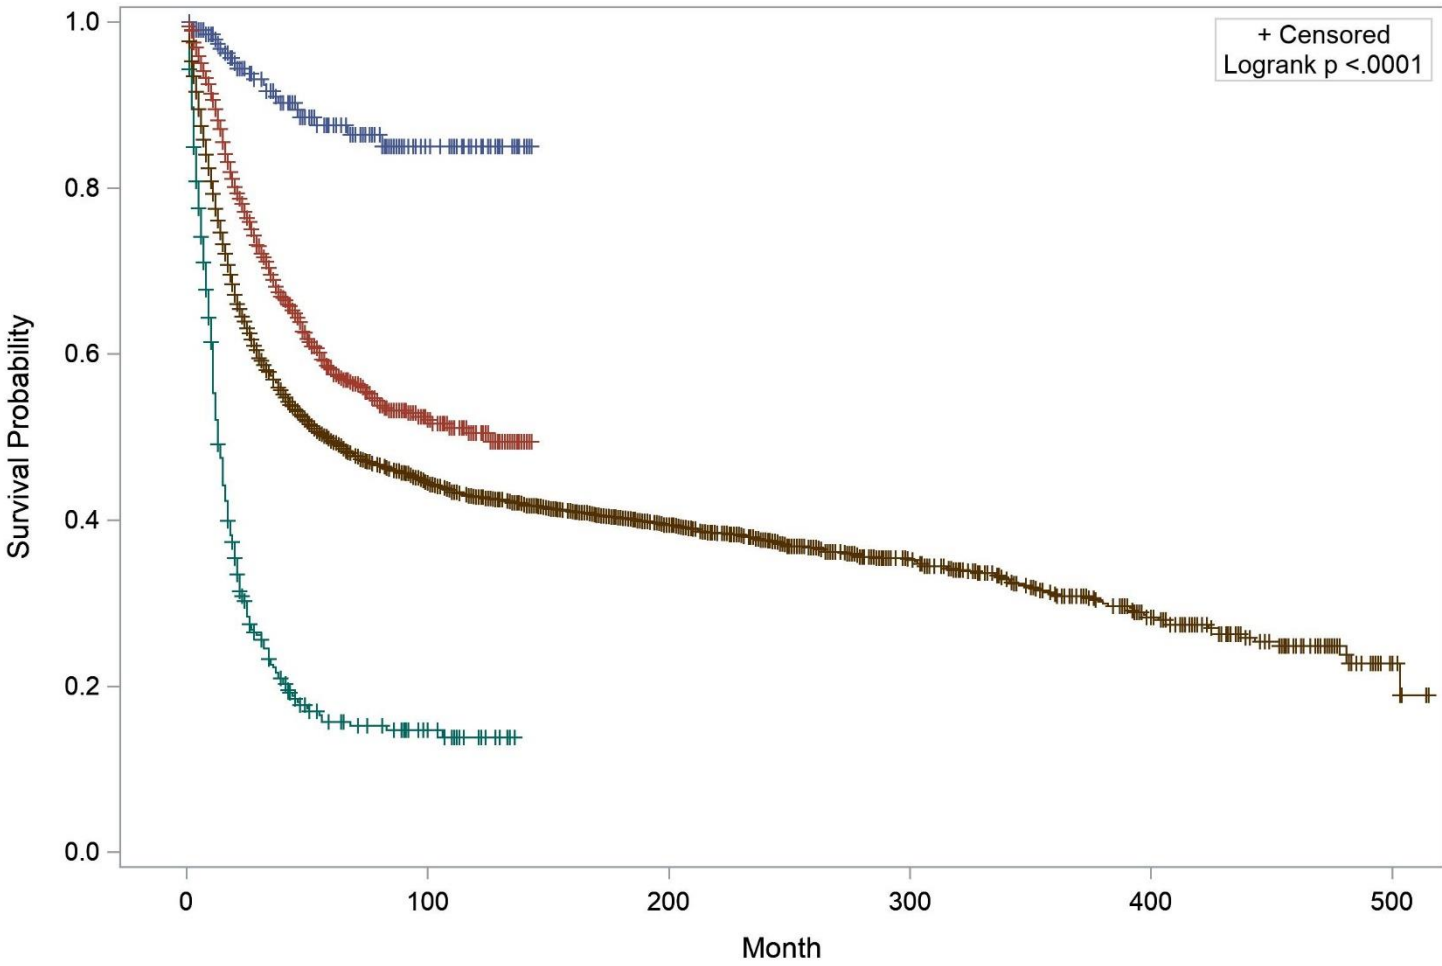

AJCC — 1 — 2 — 3 — unknown

### Log of Negative Log of Estimated Survivor Functions

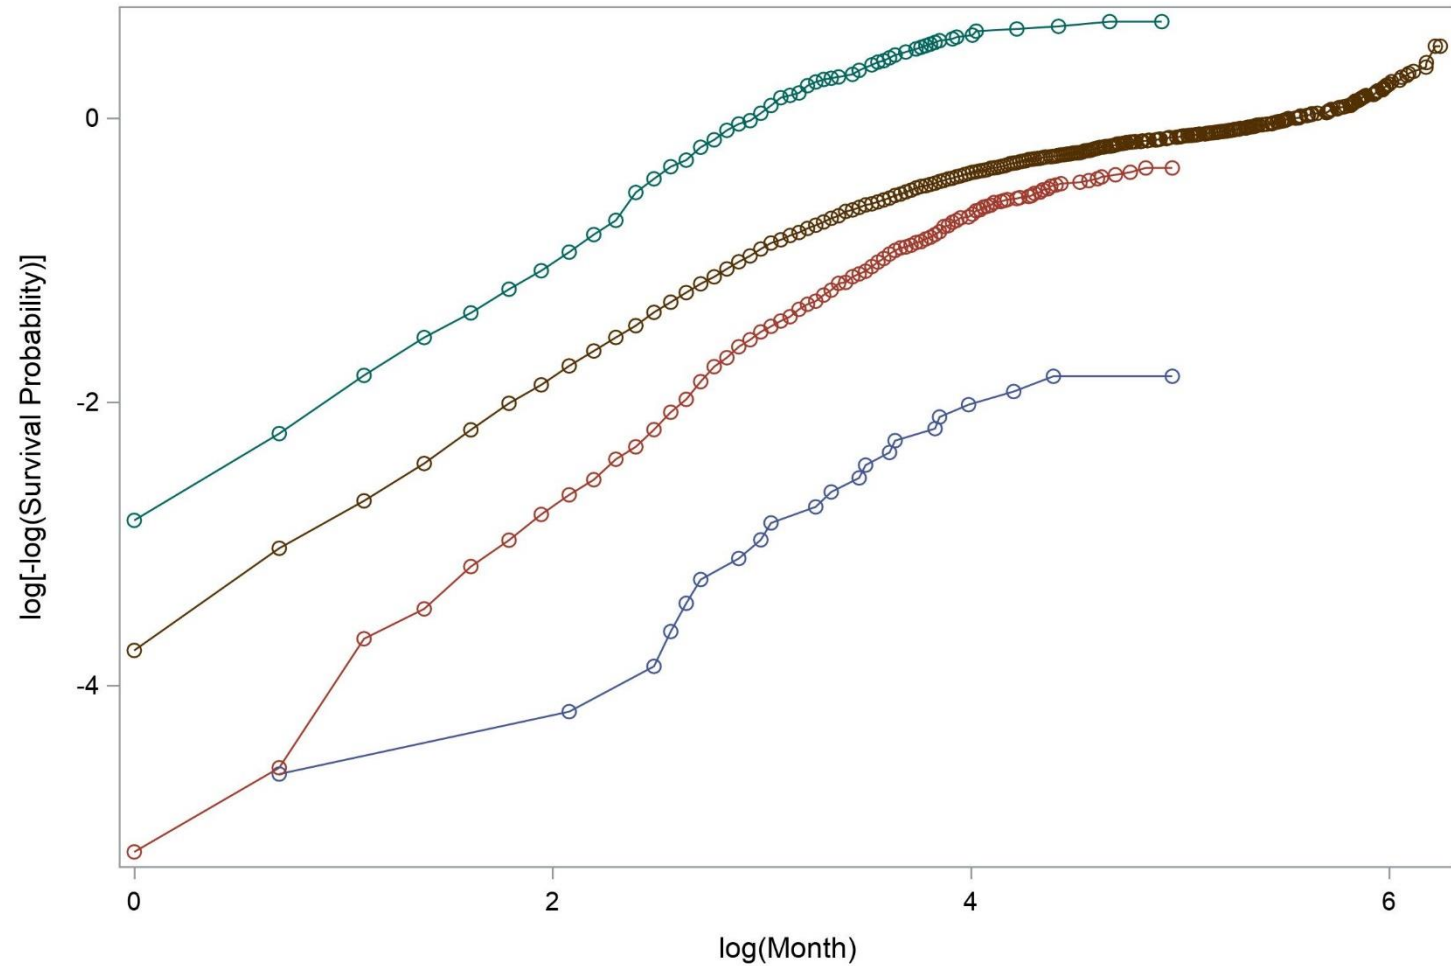

AJCC — 1 — 2 — 3 — unknown



# Surgery

### Product-Limit Survival Estimates

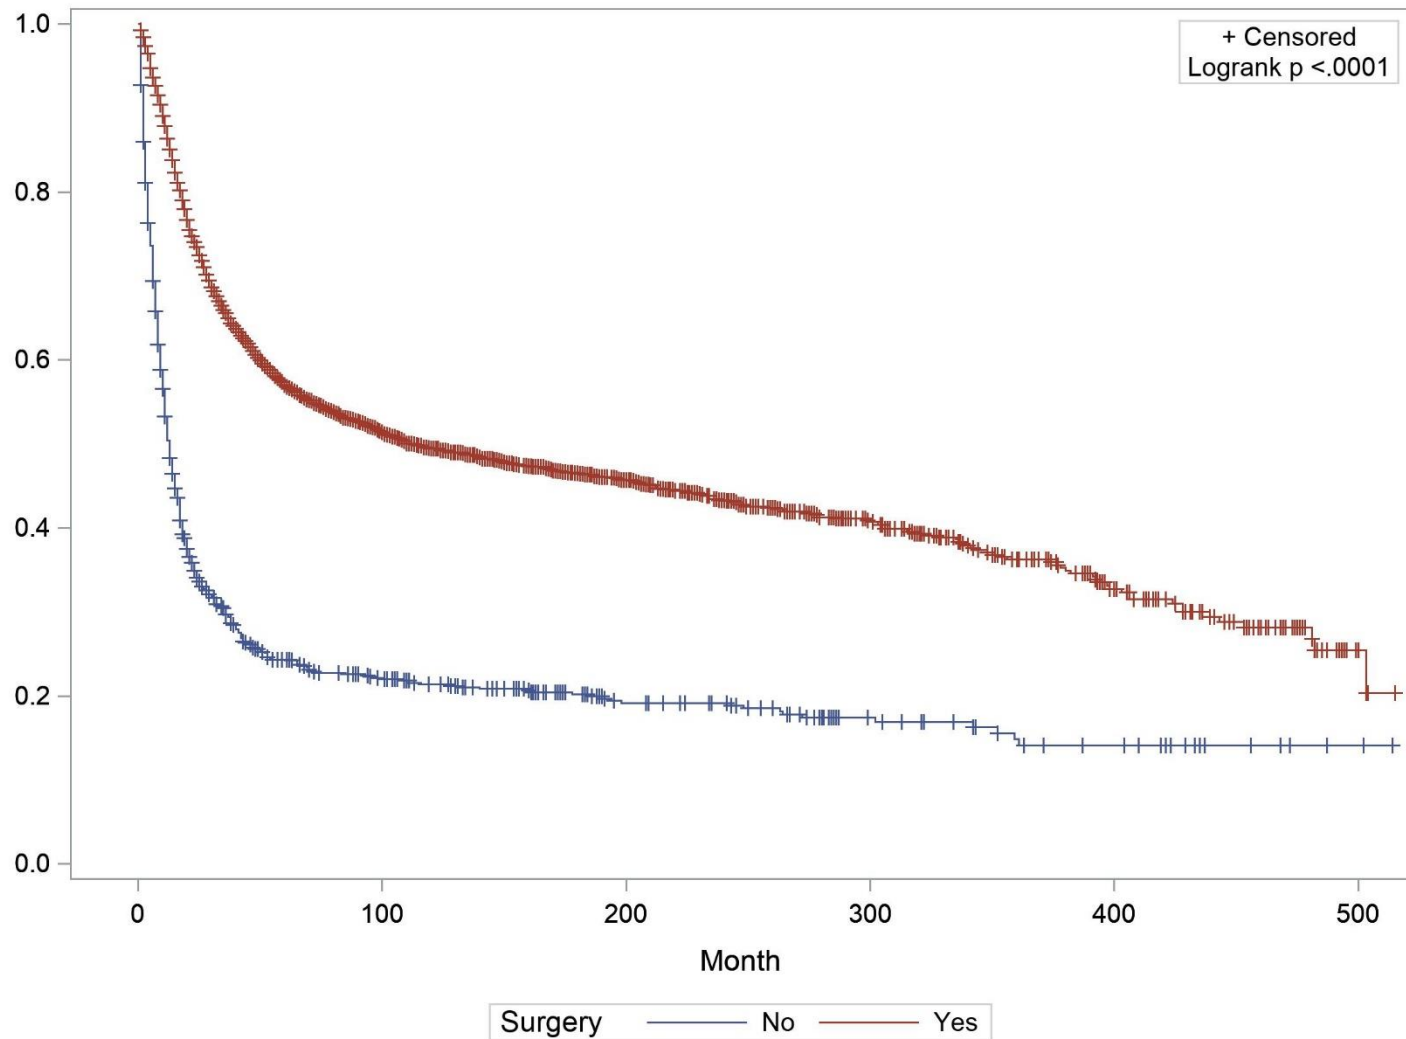

### Log of Negative Log of Estimated Survivor Functions

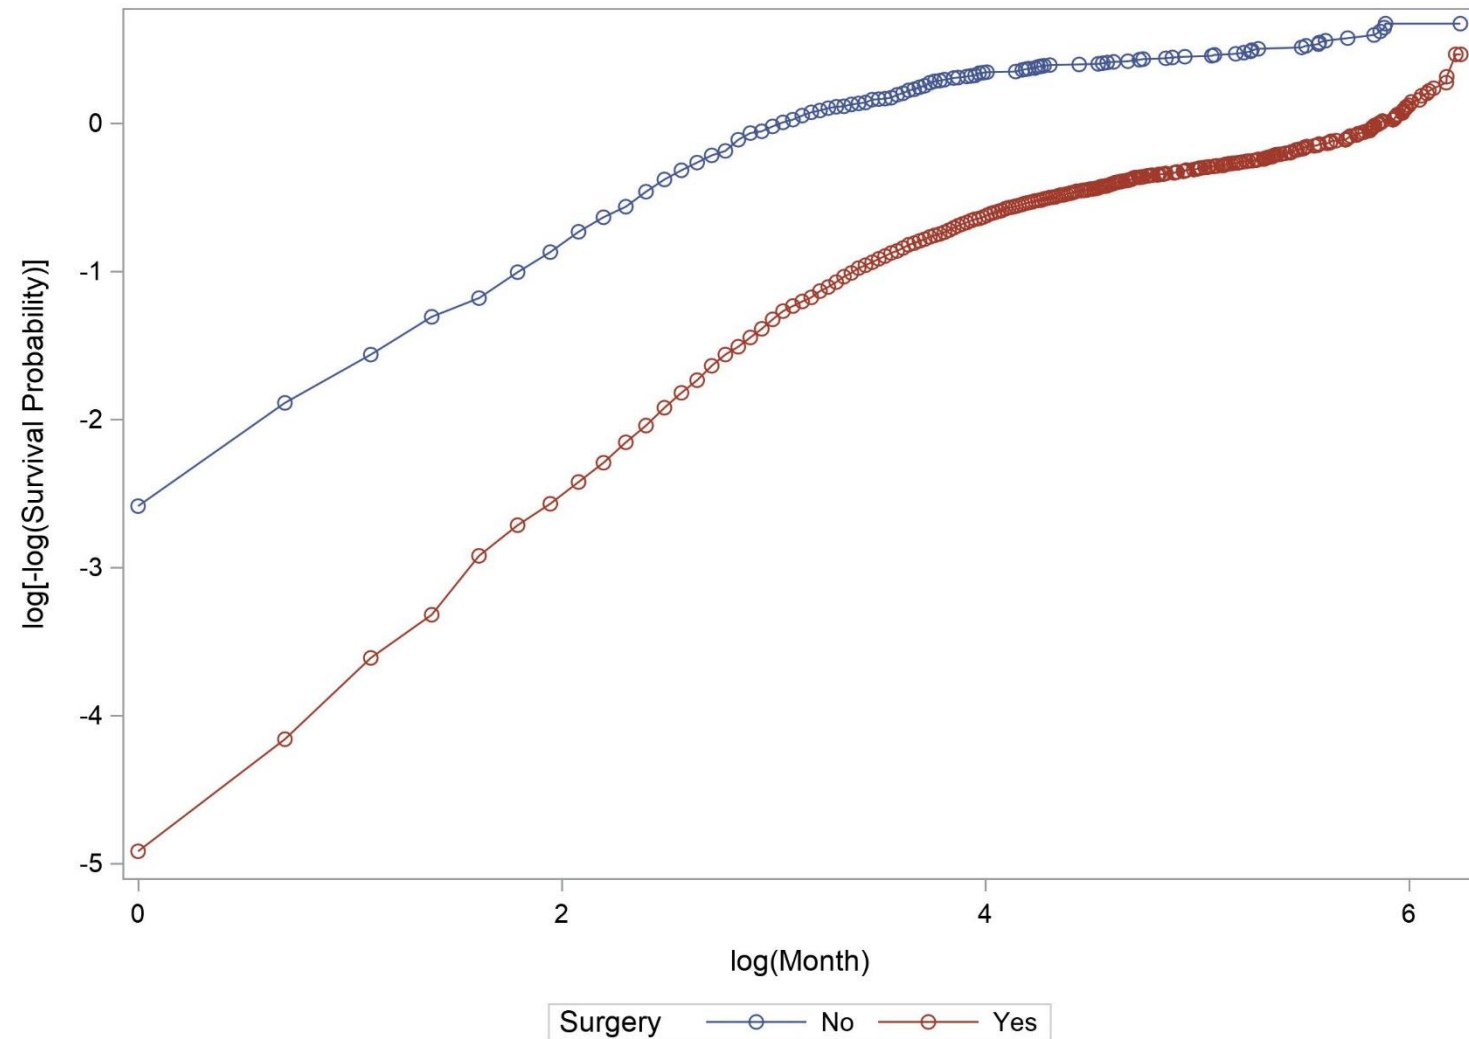

# Radiation

### Product-Limit Survival Estimates

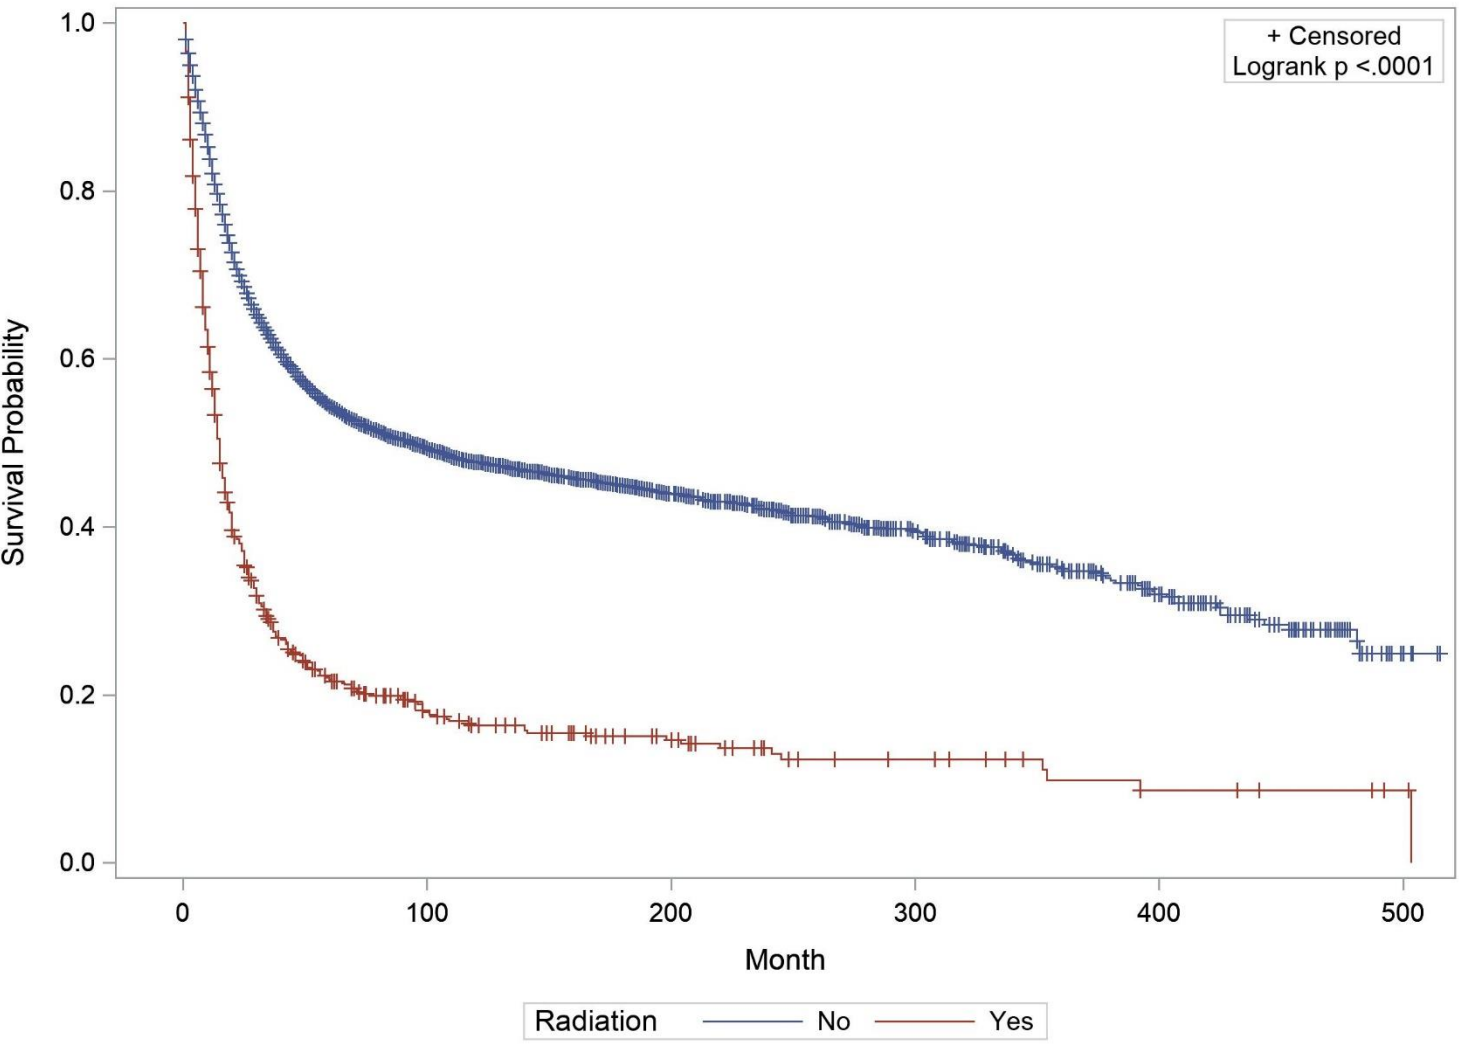

### Log of Negative Log of Estimated Survivor Functions

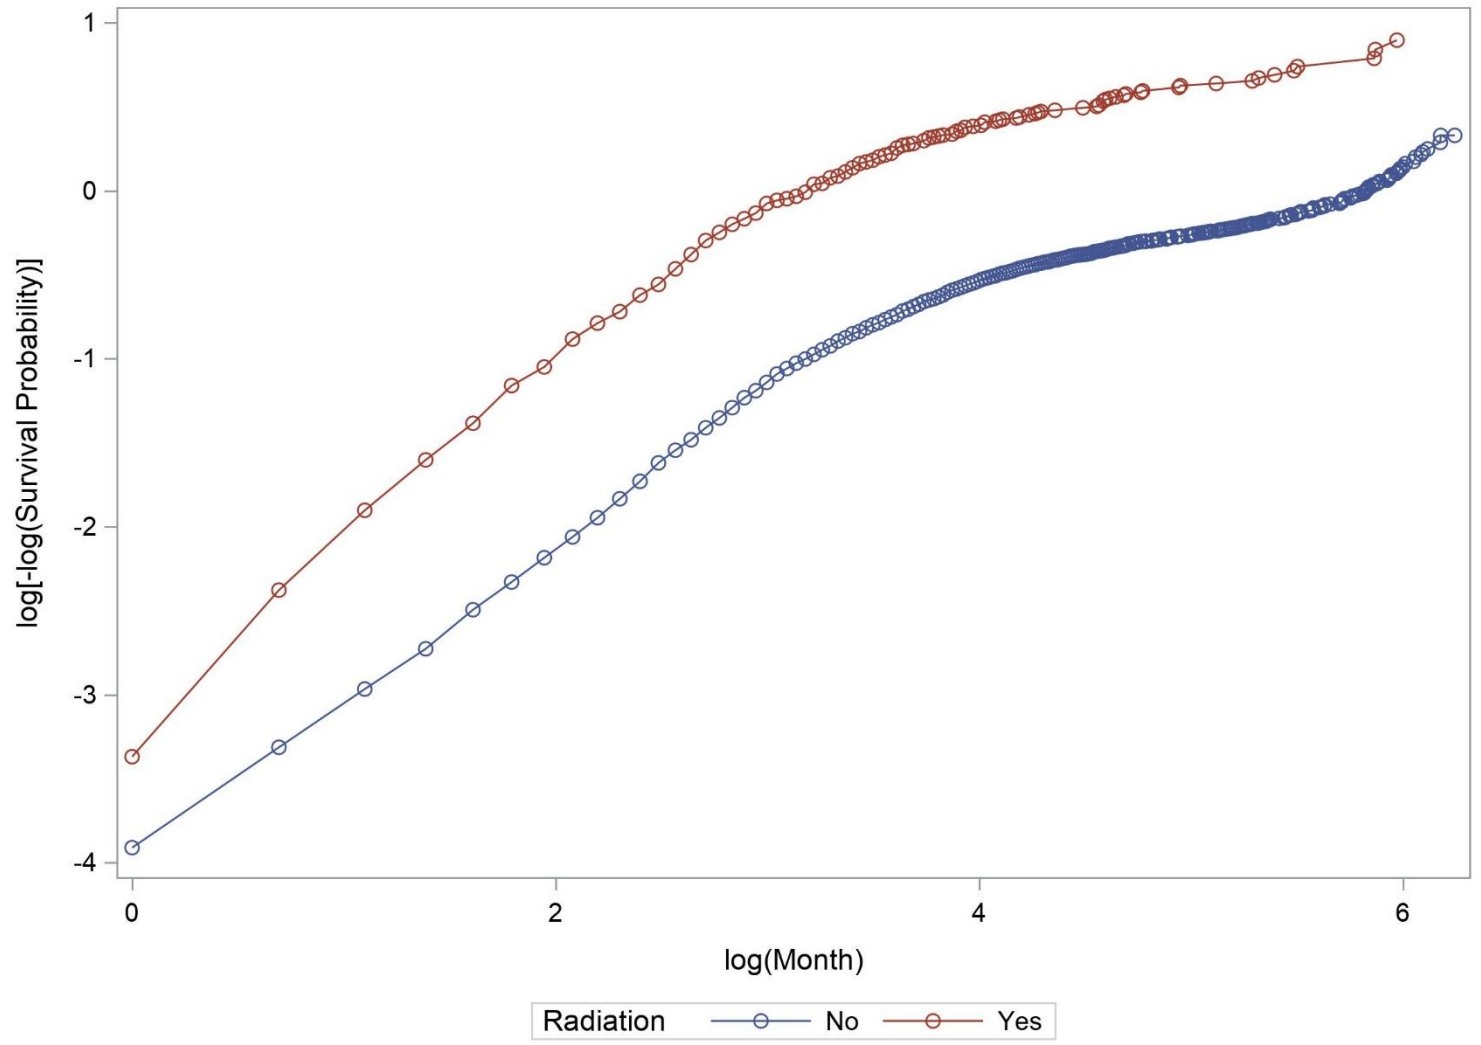

# Chemotherapy

### Product-Limit Survival Estimates

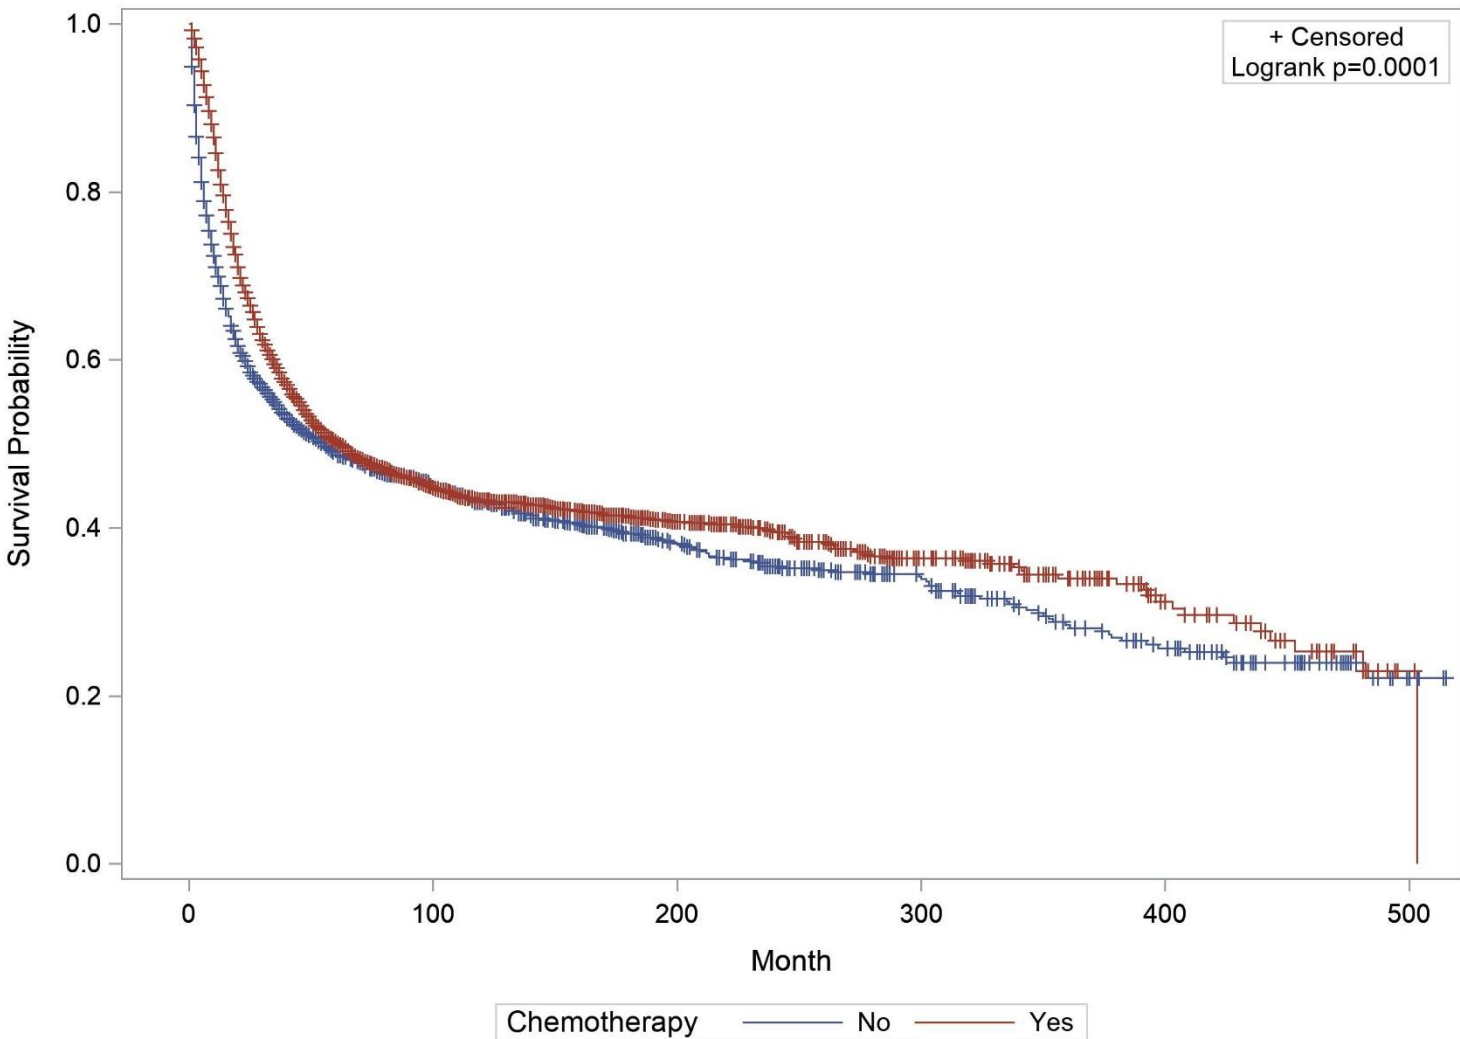

### Log of Negative Log of Estimated Survivor Functions

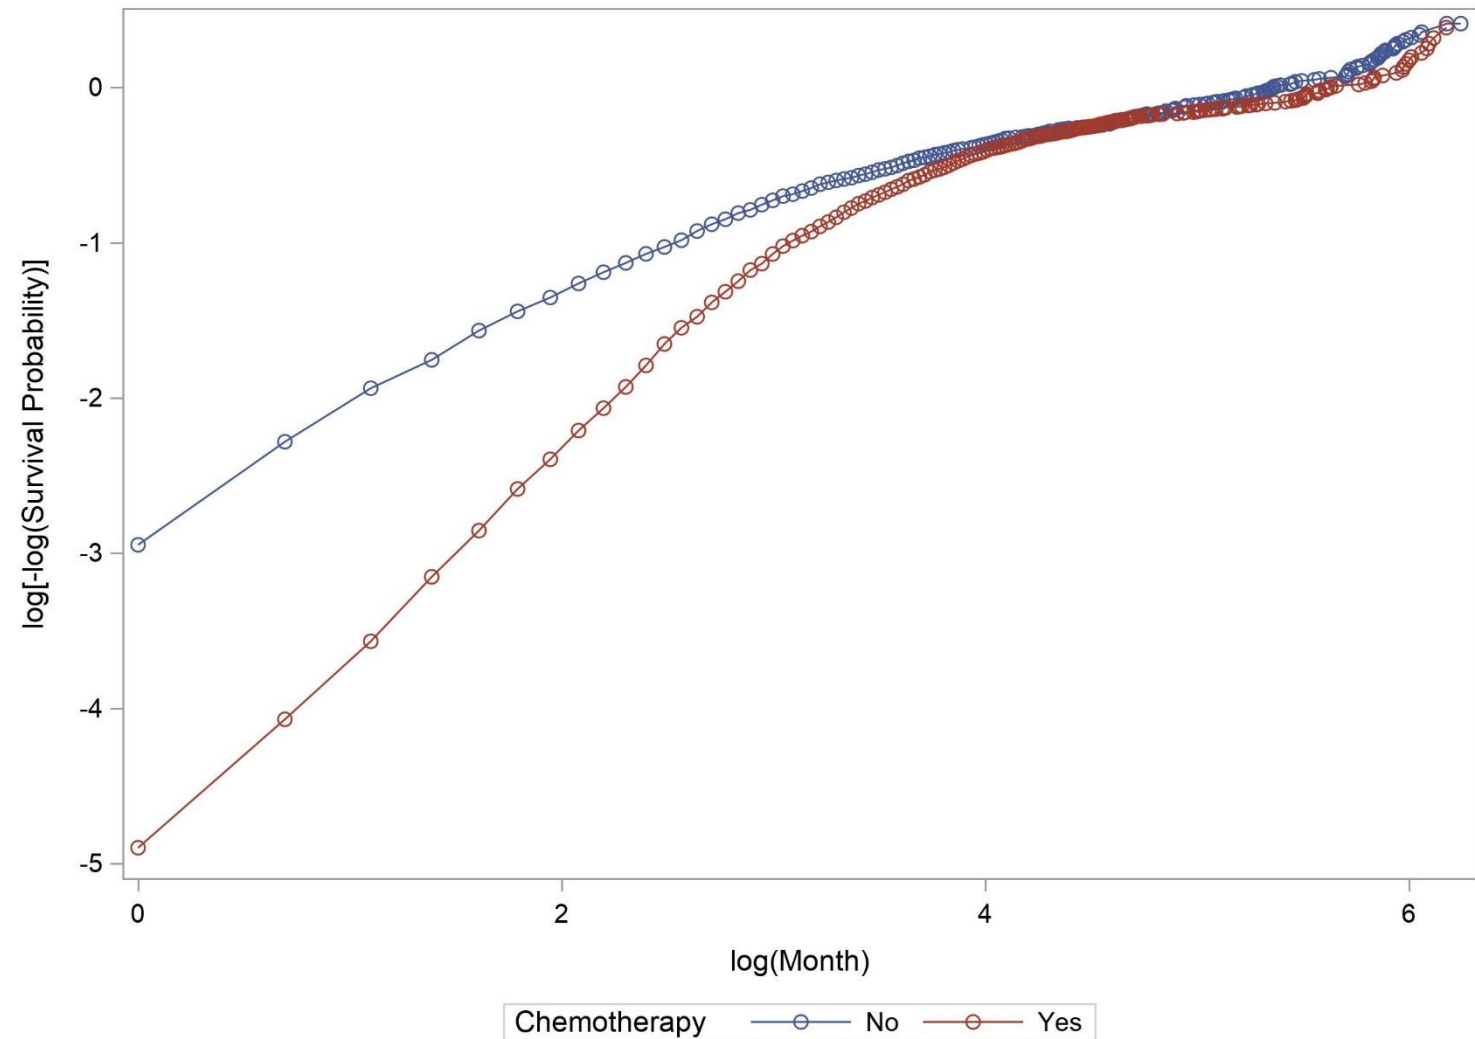

Supplement: f1 [file 7264382.f1.pdf]
